# Supplementary material
Source: PubMed Central journal article supplement (PMC2829435)
Supplement: NIHMS173285-supplement-Supplementary.pdf [file NIHMS173285-supplement-Supplementary.pdf]

**Table 1b. Baseline Characteristics in those with and without MPO and sCD40L data**

|                                   | Data<br>Available<br>(N = 1524) | Data Not<br>Available<br>(N = 695) | p      |
|-----------------------------------|---------------------------------|------------------------------------|--------|
| <b>Demographics</b>               |                                 |                                    |        |
| Age, y                            | 61 (52, 70)                     | 65 (55, 73)                        | <0.001 |
| Age > 65 y                        | 40.1                            | 50.5                               | <0.001 |
| Female                            | 33.0                            | 36.6                               | 0.09   |
| <b>Risk Factors</b>               |                                 |                                    |        |
| Weight, kg                        | 83 (72, 95)                     | 80 (70, 92)                        | 0.001  |
| Current smoker                    | 29.1                            | 24.1                               | 0.01   |
| Diabetes                          | 27.1                            | 28.8                               | 0.40   |
| History of hypertension           | 65.6                            | 67.1                               | 0.48   |
| Hypercholesterolemia              | 62.9                            | 55.6                               | 0.001  |
| <b>Cardiovascular History</b>     |                                 |                                    |        |
| Prior myocardial infarction       | 39.2                            | 38.5                               | 0.74   |
| Prior heart failure               | 6.2                             | 9.7                                | 0.003  |
| Prior PCI                         | 28.4                            | 24.8                               | 0.046  |
| Prior CABG                        | 22.4                            | 20.6                               | 0.34   |
| <b>Presenting Characteristics</b> |                                 |                                    |        |
| Heart rate >100 bpm               | 5.3                             | 5.7                                | 0.74   |
| Systolic BP <100 mmHg             | 2.4                             | 3.3                                | 0.23   |
| ST depression ≥ 1.0 mm            | 30.0                            | 31.6                               | 0.47   |
| Index diagnosis MI                | 35.1                            | 42.0                               | 0.002  |

Data are shown as n (%) for dichotomous variables and median (25, 75<sup>th</sup> percentile) for continuous variables. BP indicates blood pressure; CI, confidence interval; MI, myocardial infarction; PCI, percutaneous interventions; CABG, coronary artery bypass grafting.
